# Supplementary figures and images for: Highly steam-stable mesoporous silica assembled from preformed zeolite precursors at high temperatures
Source: Royal Society of Chemistry journal article supplement (doi:10.1039/b509273f), 2005-01-01

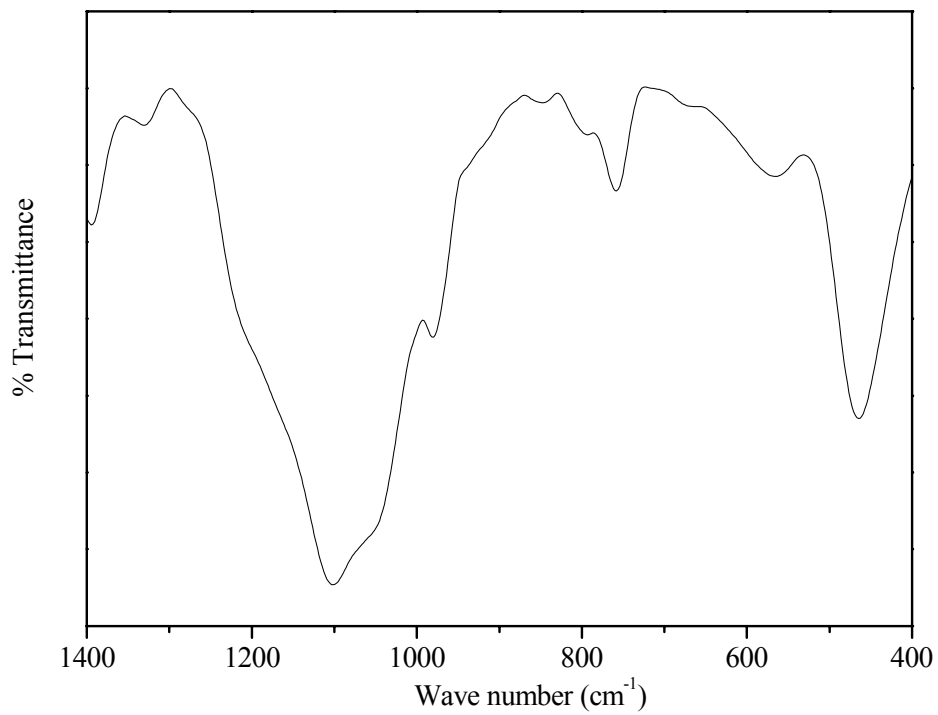

**Supporting Figure S1**

Supplement: b509273f.pdf [file b509273f.pdf]
